# Supplementary material for: Machine learning models for outcome prediction of Chinese uveal melanoma patients: A 15‐year follow‐up study
Source: PubMed Central journal article supplement — Cancer Commun (Lond). 2022 Jan 9;42(3):273–6. doi: 10.1002/cac2.12253 (PMC8923127; doi:10.1002/cac2.12253), 2022-01-09
Supplement: CAC2-42-273-s001.pdf [file CAC2-42-273-s001.pdf]

1 **Supplementary Files for**  
2 **Machine learning models for outcome prediction of Chinese uveal melanoma patients: a**  
3 **15-year follow-up study**

4 Yu-Ning Chen<sup>1†</sup>, Yi-Ning Wang<sup>1†</sup>, Meng-Xi Chen<sup>1†</sup>, Kai Zhang<sup>2</sup>, Rong-Tian Chen<sup>1</sup>, Rui Fang<sup>1</sup>, Heng  
5 Wang<sup>1</sup>, Hai-Han Zhang<sup>1</sup>, Yi-Ning Huang<sup>1</sup>, Yu Feng<sup>1</sup>, Jing-Ting Luo<sup>1</sup>, Yin-Jun Lan<sup>1</sup>, Yue-Ming Liu<sup>1\*</sup>,  
6 Yang Li<sup>1\*</sup>, Wen-Bin Wei<sup>1\*</sup>

7

8 <sup>1</sup>Beijing Tongren Eye Center, Beijing Key Laboratory of Intraocular Tumor Diagnosis and Treatment,  
9 Beijing Ophthalmology & Visual Sciences Key Lab, Medical Artificial Intelligence Research and  
10 Verification Key Laboratory of the Ministry of Industry and Information Technology, Beijing Tongren  
11 Hospital, Capital Medical University, Beijing, 100730, P. R. China

12 <sup>2</sup>InferVision Healthcare Science and Technology Limited Company, Shanghai, 200030, P. R. China

13

14 Table of Contents

15 **Supplementary Materials and Methods**.....2  
16 **Supplementary Table S1. Features of the 1553 UM patients’ features, treatment, and outcome.** .....7  
17 **Supplementary Table S2. Sites of metastasis** .....9  
18 **Supplementary Table S3. Univariate analysis by Kaplan-Meier and multivariate analysis by Cox**  
19 **regression for UM-related metastasis and all causes of death.** .....9  
20 **Supplementary Figure S1. Six factors related to death according to multivariate analysis**.....15  
21 **Supplementary Figure S2. Four factors related to metastasis according to multivariate analysis**.....15  
22 **Supplementary Figure S3. Machine learning result of death model (UMDeath)**.....16  
23 **Supplementary Figure S4. Machine learning result of metastasis model (UMMetastasis)**.....16

24

## 25 **Supplementary Materials and Methods**

### 26 **1. Study participants**

27 This retrospective investigation included all patients treated for UM at the Beijing Tongren  
28 Eye Center (Beijing, China) between January 2005 and February 2020 ( $n = 1619$ ). We  
29 excluded patients without complete clinical data ( $n = 40$ ) and those who received treatment at  
30 other hospitals ( $n = 26$ ). The remaining 1553 patients were evaluated and initially treated by  
31 our ophthalmological-oncologist team. These UM patients were included consecutively. The  
32 main diagnostic strategies were consistent with recommendations of the Collaborative Ocular  
33 Melanoma Study[1]. Demographic information (age, gender) and general ocular features  
34 (visual acuity, intraocular pressure, laterality) were recorded. Several strategies, including  
35 fundus photography, fluorescein angiography, indocyanine green angiography, standardized  
36 echography and orbital magnetic resonance imaging were conducted to assist diagnosis.  
37 Images and medical records were carefully evaluated for tumor-related features: tumor  
38 configuration, pigmentation, quadrant locations, optic disk involvement, association with  
39 subretinal fluid, intraocular hemorrhage, ciliary body involvement, and extraocular extension.  
40 The largest tumor basal diameter and thickness were measured using standardized  
41 ultrasonography. Extrascleral extension and ciliary body involvement were estimated based  
42 on thorough clinical checks and intraoperative findings. Tumors were staged according to the  
43 American Joint Committee on Cancer consensus (7<sup>th</sup> edition)[2]. The type of therapy  
44 depended on the size and characteristics of the tumors, as described previously[3].  
45 Histopathological examinations were available for patients who underwent local resection or  
46 enucleation. Tumor cell types were determined by light microscopy using hematoxylin-eosin  
47 staining. Time and sites of metastasis were documented. Time and cause of death were  
48 obtained from the patients' families. The survival time was defined as the interval (measured  
49 in months) between the date of the initial therapy or supportive care and the date of death or  
50 the date of the last follow-up (February 26, 2021).

51

### 52 **2. Statistical analysis**

53 Kaplan-Meier analysis was used to estimate survival and metastasis rate. For univariate

54 analysis, Chi-square tests were used, and we chose those variables with  $P < 0.05$  as well as  
55 those with significant clinical features from previous studies[3, 4] (i.e., age, the largest tumor  
56 basal diameter and thickness) for multivariate analysis with Cox proportional hazard  
57 regression. The statistical analyses were performed using the Statistical Product and Service  
58 Solutions (SPSS) software version 25 (International Business Machines Corporation, Armonk,  
59 New York, United States).

60

### 61 **3. Missing value completion**

62 There were some missing data due to the loss of clinical data and some features that were not  
63 properly documented. The missForest algorithm (R package missForest, [https://cran.r-](https://cran.r-project.org/web/packages/missForest/index.html)  
64 [project.org/web/packages/missForest/index.html](https://cran.r-project.org/web/packages/missForest/index.html)) was used to impute missing values in the  
65 dataset[5]. MissForest iteratively filled all features with missing values by predicting missing  
66 values from existing values. The order for filling missing values was from features with the  
67 fewest missing values to the feature with the most missing values. Moreover, numerical  
68 features and nominal features were predicted with random forest regression and classification,  
69 respectively.

70

### 71 **4. Prediction model**

72 Machine learning is a powerful tool to mine hidden relationships in a dataset, including  
73 imaging, genetic, clinical, multimodal sensor data, and more[6-16]. Random forest[17, 18]  
74 was used to construct two models: whether a patient will survive for more than 2 years after  
75 treatment and whether the tumor will metastasize within 2 years of treatment using  
76 demographic attributes, general ocular features, and tumor-specific features. Some samples  
77 and features were excluded before constructing these two models as the dataset was  
78 preprocessed and then used to train the machine learning model.

79 Additionally, since all the datasets were imbalanced, we used a cost-sensitive matrix  
80 parameter, which is the most convenient manner for the random forest to address this type of  
81 problem. According to the algorithm mechanism, the random forest will resample the samples  
82 as the specific elements in a cost-sensitive matrix to form all sub-datasets in which the

83 minority will be resampled less than the majority to construct each decision tree. All the  
84 elements in the cost-sensitive matrix represent the cost for misclassifying a sample of class  $i$   
85 to class  $j$ . The number of trees in the random forest was primarily set to 500 when  
86 experiments were carried out. Four-fold cross-validation was used to fairly evaluate the  
87 performance of random forest, and the subjects in each fold were independent[18]. We  
88 provided models in the format of .mat that can be applied repeatedly with MATLAB  
89 ([https://github.com/Hugo0512/UM\\_Prognosis](https://github.com/Hugo0512/UM_Prognosis)).

90

## 91 **5. Feature selection**

92 We applied the genetic feature selection to study which features were more informative in the  
93 two models. Then, all features selected by the genetic algorithm[19] were ranked with a  
94 feature ranking algorithm[18] to weigh their importance. To alleviate the stochasticity of the  
95 genetic algorithm and random forest, the genetic algorithm was repeatedly run 20 times and  
96 the run with the highest fitness function (classification accuracy) was chosen as the final  
97 result.

98

## 99 **6. Evaluation metrics**

100 Accuracy, sensitivity (recall rate), specificity, receiver operating characteristic curve (ROC),  
101 precision-recall (PR) curve and area under ROC curve [20, 21] were used to evaluate the  
102 performance of models. Mean value, standard deviation, and 95% confidence interval were  
103 evaluated for all metrics. ROC curve indicates how many samples of  $i$ th class are recognized  
104 conditioned on a specific number of  $j$ th class ( $j \in [1,c]/i$ ), are classified as  $i$ th class, PR  
105 (precision-recall) curve illustrates how many samples of  $j$ th class are recognized as samples of  
106  $i$ th class conditioned on a specific number of  $j$ th class ( $j \in [1,c]/i$ ), are classified as  $i$ th  
107 class[21]. Precision is the ratio between the number of true positive and the total number of  
108 samples that were classified as positive. Accuracy, sensitivity (recall rate), specificity,  
109 precision were considered dimensionless.

110

## 111 **References**

- 112 1. Accuracy of diagnosis of choroidal melanomas in the Collaborative Ocular Melanoma Study.  
113 COMS report no. 1. Arch Ophthalmol. 1990;108(9):1268-73.

- 114 2. Shields CL, Kaliki S, Furuta M, Fulco E, Alarcon C, Shields JA. American Joint Committee on  
115 Cancer Classification of Uveal Melanoma (Anatomic Stage) Predicts Prognosis in 7,731 Patients: The  
116 2013 Zimmerman Lecture. *Ophthalmology*. 2015;122(6):1180-1186.
- 117 3. Liu YM, Li Y, Wei WB, Xu X, Jonas JB. Clinical Characteristics of 582 Patients with Uveal  
118 Melanoma in China. *PLoS One*. 2015;10(12):e0144562.
- 119 4. Jager MJ, Shields CL, Cebulla CM, Abdel-Rahman MH, Grossniklaus HE, Stern MH, et al. Uveal  
120 melanoma. *Nat Rev Dis Primers*. 2020;6(1):24.
- 121 5. Lin D, Chen J, Lin Z, Li X, Zhang K, Wu X, et al. A practical model for the identification of  
122 congenital cataracts using machine learning. *EBioMedicine*. 2020;51:102621.
- 123 6. Kather JN, Pearson AT, Halama N, Jager D, Krause J, Loosen SH, et al. Deep learning can  
124 predict microsatellite instability directly from histology in gastrointestinal cancer. *Nat Med*.  
125 2019;25(7):1054-6.
- 126 7. Mucaki EJ, Zhao JZL, Lizotte DJ, Rogan PK. Predicting responses to platin chemotherapy  
127 agents with biochemically-inspired machine learning. *Signal Transduct Target Ther*. 2019;4:1.
- 128 8. Wang L, Zhang K, Liu X, Long E, Jiang J, An Y, et al. Comparative analysis of image classification  
129 methods for automatic diagnosis of ophthalmic images. *Sci Rep*. 2017;7:41545.
- 130 9. Li W, Yang Y, Zhang K, Long E, He L, Zhang L, et al. Dense anatomical annotation of slit-lamp  
131 images improves the performance of deep learning for the diagnosis of ophthalmic disorders. *Nat*  
132 *Biomed Eng*. 2020;4(8):767-77.
- 133 10. Hannun AY, Rajpurkar P, Haghpanahi M, Tison GH, Bourn C, Turakhia MP, et al. Cardiologist-  
134 level arrhythmia detection and classification in ambulatory electrocardiograms using a deep neural  
135 network. *Nat Med*. 2019;25(1):65-9.
- 136 11. Liu Y, Jain A, Eng C, Way DH, Lee K, Bui P, et al. A deep learning system for differential  
137 diagnosis of skin diseases. *Nat Med*. 2020;26(6):900-8.
- 138 12. Mei X, Lee HC, Diao KY, Huang M, Lin B, Liu C, et al. Artificial intelligence-enabled rapid  
139 diagnosis of patients with COVID-19. *Nat Med*. 2020;26(8):1224-8.
- 140 13. Hyland SL, Faltys M, Huser M, Lyu X, Gumbsch T, Esteban C, et al. Early prediction of  
141 circulatory failure in the intensive care unit using machine learning. *Nat Med*. 2020;26(3):364-73.
- 142 14. Park SM, Won DD, Lee BJ, Escobedo D, Esteva A, Aalipour A, et al. A mountable toilet system  
143 for personalized health monitoring via the analysis of excreta. *Nat Biomed Eng*. 2020;4(6):624-35.
- 144 15. Yang J, Zhang K, Fan H, Huang Z, Xiang Y, Yang J, et al. Development and validation of deep  
145 learning algorithms for scoliosis screening using back images. *Commun Biol*. 2019;2:390.
- 146 16. Zhang Y, Li F, Yuan F, Zhang K, Huo L, Dong Z, et al. Diagnosing chronic atrophic gastritis by  
147 gastroscopy using artificial intelligence. *Dig Liver Dis*. 2020;52(5):566-72.
- 148 17. Zhang K, Liu X, Jiang J, Li W, Wang S, Liu L, et al. Prediction of postoperative complications of  
149 pediatric cataract patients using data mining. *J Transl Med*. 2019;17(1):2.
- 150 18. Zhang X, Zhang K, Lin D, Zhu Y, Chen C, He L, et al. Artificial intelligence deciphers codes for  
151 color and odor perceptions based on large-scale chemoinformatic data. *Gigascience*. 2020;9(2).
- 152 19. Zhang K, Pan Q, Yu D, Wang L, Liu Z, Li X, et al. Systemically modeling the relationship  
153 between climate change and wheat aphid abundance. *Sci Total Environ*. 2019;674:392-400.
- 154 20. Zhang K, Li X, He L, Guo C, Yang Y, Dong Z, et al. A human-in-the-loop deep learning paradigm  
155 for synergic visual evaluation in children. *Neural Netw*. 2020;122:163-73.
- 156 21. Zhang K, Liu X, Liu F, He L, Zhang L, Yang Y, et al. An Interpretable and Expandable Deep  
157 Learning Diagnostic System for Multiple Ocular Diseases: Qualitative Study. *J Med Internet Res*.

158 2018;20(11):e111144.

159

160 **Supplementary Tables**161 **Supplementary Table S1. Features of the 1553 UM patients' features, treatment, and**  
162 **outcome.**

| <b>Feature</b>                                               | <b>Category</b>   | <b>Number of Patients<br/>(n = 1553 [%])</b> |
|--------------------------------------------------------------|-------------------|----------------------------------------------|
| <b>Demographic feature</b>                                   |                   |                                              |
| Gender                                                       | Male              | 793 (51.1%)                                  |
|                                                              | Female            | 760 (48.9%)                                  |
| Age (years)                                                  | ≤ 20 years        | 20 (1.3%)                                    |
|                                                              | 21-40             | 439 (28.3%)                                  |
|                                                              | 41-60             | 861 (55.4%)                                  |
|                                                              | 61-80             | 231 (14.9%)                                  |
|                                                              | > 80              | 2 (0.1%)                                     |
| <b>General ocular feature</b>                                |                   |                                              |
| Laterality                                                   | Right             | 794 (51.1%)                                  |
|                                                              | Left              | 759 (48.9%)                                  |
| Visual acuity (LogMAR)<br>(available for 1507 patients)      | > 1.00            | 512 (34.0%)                                  |
|                                                              | 0.31-1.00         | 527 (35.0%)                                  |
|                                                              | 0.10-0.30         | 234 (15.5%)                                  |
|                                                              | ≤ 0.10            | 234 (15.5%)                                  |
| Intraocular pressure (mmHg)<br>(available for 1494 patients) | < 10              | 148 (9.9%)                                   |
|                                                              | 10-21             | 1279 (85.6%)                                 |
|                                                              | > 21              | 67 (4.5%)                                    |
| <b>Tumor-specific features</b>                               |                   |                                              |
| Size (AJCC Classification)<br>(available for 1530 patients)  | T1                | 219 (14.3%)                                  |
|                                                              | T2                | 619 (40.5%)                                  |
|                                                              | T3                | 564 (36.9%)                                  |
|                                                              | T4                | 128 (8.4%)                                   |
| Pigmentation                                                 | Pigmented         | 1538 (99.0%)                                 |
|                                                              | Non-pigmented     | 15 (1.0%)                                    |
| Location of tumor in uveal<br>melanoma                       | Ciliary body      | 66 (4.2%)                                    |
|                                                              | Iris              | 5 (0.3%)                                     |
|                                                              | Choroid           | 1482 (95.4%)                                 |
| Position<br>(available for 1522 patients)                    | Superior          | 114 (7.5%)                                   |
|                                                              | Nasal             | 164 (10.8%)                                  |
|                                                              | Inferior          | 105 (6.9%)                                   |
|                                                              | Temporal          | 279 (18.3%)                                  |
|                                                              | Superior temporal | 298 (19.6%)                                  |
|                                                              | Superior nasal    | 117 (7.7%)                                   |
|                                                              | Inferior nasal    | 124 (8.1%)                                   |
|                                                              | Inferior temporal | 257 (16.9%)                                  |
|                                                              | Macula            | 58 (3.8%)                                    |
|                                                              | Bifocal           | 6 (0.4%)                                     |
| Macroscopic appearance<br>(available for 1411 patients)      | Mushroom          | 481 (34.1%)                                  |
|                                                              | Flat              | 87 (6.2%)                                    |
|                                                              | Hemisphere        | 710 (50.3%)                                  |
|                                                              | Irregular         | 114 (8.1%)                                   |
|                                                              | Diffuse           | 19 (1.3%)                                    |
| Optic disk involvement                                       | Yes               | 74 (4.8%)                                    |
|                                                              | No                | 1479 (95.2%)                                 |
| Subretinal fluid<br>(available for 1541 patients)            | Yes               | 1154 (74.9%)                                 |
|                                                              | No                | 387 (25.1%)                                  |

|                                                           |                                 |               |
|-----------------------------------------------------------|---------------------------------|---------------|
| Intraocular hemorrhage<br>(available for 1524 patients)   | Yes                             | 77 (5.1%)     |
|                                                           | No                              | 1447 (94.9%)  |
| Ciliary body involvement<br>(available for 1552 patients) | Yes                             | 235 (15.1%)   |
|                                                           | No                              | 1317 (84.9%)  |
| Extraocular extension                                     | Yes                             | 11 (0.7%)     |
|                                                           | No                              | 1542 (99.3%)  |
| <b>T stage*</b><br>(available for 1530 patients)          | T1a                             | 198 (12.9%)   |
|                                                           | T1b                             | 21 (1.4%)     |
|                                                           | T2a                             | 588 (38.4%)   |
|                                                           | T2b                             | 29 (1.9%)     |
|                                                           | T2c                             | 1 (0.1%)      |
|                                                           | T2d                             | 1 (0.1%)      |
|                                                           | T3a                             | 451 (29.5%)   |
|                                                           | T3b                             | 109 (7.1%)    |
|                                                           | T3c                             | 2 (0.1%)      |
|                                                           | T3d                             | 2 (0.1%)      |
|                                                           | T4a                             | 55 (3.6%)     |
|                                                           | T4b                             | 68 (4.4%)     |
|                                                           | T4c                             | 3 (0.2%)      |
|                                                           | T4d                             | 2 (0.1%)      |
| <b>M stage*</b><br>(available for 1530 patients)          | M0                              | 1530 (100.0%) |
| <b>TNM stage*</b><br>(available for 1530 patients)        | I                               | 198 (12.9%)   |
|                                                           | IIA                             | 609 (39.8%)   |
|                                                           | IIB                             | 480 (31.4%)   |
|                                                           | IIIA                            | 168 (11.0%)   |
|                                                           | IIIB                            | 73 (4.8%)     |
|                                                           | IIIC                            | 2 (0.1%)      |
| <b>Initial treatment</b>                                  | Episcleral brachytherapy        | 1122 (72.2%)  |
|                                                           | Local resection                 | 74 (4.8%)     |
|                                                           | Enucleation                     | 234 (15.1%)   |
|                                                           | Local laser phototherapy        | 112 (7.2%)    |
|                                                           | Observation or refuse treatment | 11 (0.7%)     |
| <b>Pathology</b><br>(available for 386 patients)          | Spindle cell-type               | 172 (44.6%)   |
|                                                           | Epithelioid cell-type           | 83 (21.5%)    |
|                                                           | Mixed cell-type                 | 131 (33.9%)   |
| <b>Outcome</b>                                            | Living without metastasis       | 1292 (83.2%)  |
|                                                           | Metastasis                      | 237 (15.3%)   |
|                                                           | Death                           | 210 (13.5%)   |
| <b>Follow-up time (years)</b>                             | ≤ 1                             | 176 (11.3%)   |
|                                                           | > 1 and ≤ 3                     | 486 (31.3%)   |
|                                                           | > 3 and ≤ 5                     | 386 (24.9%)   |
|                                                           | > 5 and ≤ 10                    | 456 (29.4%)   |
|                                                           | > 10                            | 49(3.2%)      |

163 \* American Joint Committee on Cancer classification (7<sup>th</sup> edition)

164 Abbreviations: *UM*: Uveal Melanoma; *LogMAR*: Logarithm of the Minimum Angle of

165 Resolution; *AJCC*: American Joint Committee on Cancer; *TNM*: Tumor Node Metastasis



166 **Supplementary Table S2. Sites of metastasis**

| Patients with metastasis | Metastatic sites |      |        |      |       |       |         |       |        |      |          |       |         |
|--------------------------|------------------|------|--------|------|-------|-------|---------|-------|--------|------|----------|-------|---------|
|                          | Liver            | Lung | Breast | Bone | Ovary | Brain | Abdomen | Lymph | Spleen | Skin | Pancreas | Orbit | Stomach |
| No. ( <i>n</i> = 225)    | 201              | 54   | 3      | 40   | 1     | 17    | 3       | 4     | 1      | 2    | 2        | 7     | 1       |
| %                        | 89.3             | 24.0 | 1.3    | 17.8 | 0.4   | 7.6   | 1.3     | 1.8   | 0.4    | 0.9  | 0.9      | 3.1   | 0.4     |

167

168 **Supplementary Table S3. Univariate analysis by Kaplan-Meier and multivariate analysis by Cox regression for UM-related metastasis and all causes**  
 169 **of death.**

| Features                    | 1553 cases<br><i>n</i> /Mean | UM-related metastasis (237 patients) |              |                       |       |             | All-causes death (210 patients) |                  |                       |       |             |  |
|-----------------------------|------------------------------|--------------------------------------|--------------|-----------------------|-------|-------------|---------------------------------|------------------|-----------------------|-------|-------------|--|
|                             |                              | Univariate analysis                  |              | Multivariate analysis |       |             | Univariate analysis             |                  | Multivariate analysis |       |             |  |
|                             |                              | Chi-square                           | <i>P</i>     | <i>P</i>              | HR    | 95% CI      | Chi-square                      | <i>P</i>         | <i>P</i>              | HR    | 95% CI      |  |
| Gender                      |                              | 0.091                                | 0.763        |                       |       |             | 0.495                           | 0.482            |                       |       |             |  |
| Male                        | 793                          |                                      |              |                       |       |             |                                 |                  |                       |       |             |  |
| Female                      | 760                          |                                      |              |                       |       |             |                                 |                  |                       |       |             |  |
| Age (years)                 |                              | 7.563                                | <b>0.006</b> |                       |       |             | 24.427                          | <b>&lt;0.001</b> |                       |       |             |  |
| ≤ 56                        | 1219                         |                                      |              | Ref                   | -     | -           |                                 |                  | Ref                   | -     | -           |  |
| > 56                        | 334                          |                                      |              | <b>&lt;0.001</b>      | 1.814 | 1.305-2.520 |                                 |                  | <b>&lt;0.001</b>      | 2.426 | 1.725-3.410 |  |
| Laterality                  |                              | 0.387                                | 0.534        |                       |       |             | 0.143                           | 0.705            |                       |       |             |  |
| Right                       | 794                          |                                      |              |                       |       |             |                                 |                  |                       |       |             |  |
| Left                        | 759                          |                                      |              |                       |       |             |                                 |                  |                       |       |             |  |
| Visual acuity (LogMAR)      |                              | 12.982                               | <b>0.005</b> | 0.249                 |       |             | 8.421                           | <b>0.038</b>     | 0.994                 |       |             |  |
| > 1.00                      | 512                          |                                      |              | 0.359                 | 0.810 | 0.516-1.271 |                                 |                  | 0.929                 | 0.976 | 0.576-1.655 |  |
| 0.31-1.00                   | 527                          |                                      |              | 0.282                 | 0.786 | 0.507-1.219 |                                 |                  | 0.941                 | 0.981 | 0.590-1.632 |  |
| 0.10-0.30                   | 234                          |                                      |              | 0.044                 | 0.555 | 0.313-0.984 |                                 |                  | 0.895                 | 1.041 | 0.575-1.884 |  |
| ≤ 0.10                      | 234                          |                                      |              | Ref                   | -     | -           |                                 |                  | Ref                   | -     | -           |  |
| Intraocular pressure (mmHg) |                              | 6.798                                | <b>0.033</b> | 0.346                 |       |             | 4.843                           | 0.089            |                       |       |             |  |
| < 10                        | 148                          |                                      |              | 0.310                 | 1.242 | 0.817-      |                                 |                  |                       |       |             |  |

|                             |       |         |        |        |       |               |         |        |        |       |                |  |
|-----------------------------|-------|---------|--------|--------|-------|---------------|---------|--------|--------|-------|----------------|--|
| 10-21                       | 1279  |         |        | Ref    | -     | 1.888         |         |        |        |       |                |  |
| > 21                        | 67    |         |        | 0.256  | 1.571 | 0.721-3.423   |         |        |        |       |                |  |
| Largest basal diameter (mm) | 11.70 | 565.199 | <0.001 | <0.001 | 1.223 | 1.123-1.332   | 366.774 | <0.001 | <0.001 | 1.199 | 1.093-1.314    |  |
| Thickness (mm)              | 6.90  | 354.315 | <0.001 | 0.678  | 0.980 | 0.892-1.077   | 395.124 | <0.001 | 0.533  | 0.969 | 0.876-1.071    |  |
| Size                        |       | 71.722  | <0.001 | 0.331  |       |               | 64.691  | <0.001 | 0.487  |       |                |  |
| T1                          | 219   |         |        | Ref    | -     | -             |         |        | Ref    | -     | -              |  |
| T2                          | 619   |         |        | 0.311  | 0.258 | 0.019-3.556   |         |        | 0.326  | 0.269 | 0.020-3.687    |  |
| T3                          | 564   |         |        | 0.674  | 0.372 | 0.004-37.387  |         |        | 0.664  | 0.358 | 0.004-36.522   |  |
| T4                          | 128   |         |        | 0.573  | 0.156 | <0.001-99.241 |         |        | 0.676  | 0.250 | <0.001-167.513 |  |
| Pigmentation                |       | 0.811   | 0.368  |        |       |               | 3.772   | 0.052  |        |       |                |  |
| Pigmented                   | 1538  |         |        |        |       |               |         |        | Ref    | -     | -              |  |
| Non-pigmented               | 15    |         |        |        |       |               |         |        | 0.031  | 3.693 | 1.123-12.144   |  |
| Location                    |       | 2.318   | 0.314  |        |       |               | 4.964   | 0.084  |        |       |                |  |
| Ciliary body                | 66    |         |        |        |       |               |         |        |        |       |                |  |
| Iris                        | 5     |         |        |        |       |               |         |        |        |       |                |  |
| Choroid                     | 1482  |         |        |        |       |               |         |        |        |       |                |  |
| Position                    |       | 9.970   | 0.353  |        |       |               | 19.763  | 0.019  | 0.033  |       |                |  |
| Superior                    | 114   |         |        |        |       |               |         |        | Ref    | -     | -              |  |
| Nasal                       | 164   |         |        |        |       |               |         |        | 0.797  | 0.902 | 0.410-1.984    |  |
| Inferior                    | 105   |         |        |        |       |               |         |        | 0.957  | 0.977 | 0.415-2.302    |  |
| Temporal                    | 279   |         |        |        |       |               |         |        | 0.541  | 0.811 | 0.414-1.588    |  |
| Superior temporal           | 298   |         |        |        |       |               |         |        | 0.289  | 1.416 | 0.745-2.691    |  |
| Superior nasal              | 117   |         |        |        |       |               |         |        | 0.143  | 1.713 | 0.834-3.516    |  |
| Inferior nasal              | 124   |         |        |        |       |               |         |        | 0.812  | 1.095 | 0.519-2.312    |  |
| Inferior temporal           | 257   |         |        |        |       |               |         |        | 0.888  | 1.049 | 0.5433-2.025   |  |
| Macula                      | 58    |         |        |        |       |               |         |        | 0.493  | 1.622 | 0.407-6.457    |  |
| Bifocal                     | 6     |         |        |        |       |               |         |        | 0.004  | 7.383 | 1.912-28.514   |  |
| Macroscopic appearance      |       | 77.301  | <0.001 | <0.001 |       |               | 45.967  | <0.001 | 0.011  |       |                |  |
| Mushroom                    | 481   |         |        | 0.003  | 0.420 | 0.238-        |         |        | 0.087  | 0.581 | 0.312-1.082    |  |

|                          |      |        |        |        |       |                          |        |        |       |                     |
|--------------------------|------|--------|--------|--------|-------|--------------------------|--------|--------|-------|---------------------|
| Flat                     | 87   |        |        | 0.114  | 0.345 | 0.741<br>0.092-<br>1.292 |        | 0.133  | 0.356 | 0.093-1.369         |
| Hemisphere               | 710  |        |        | <0.001 | 0.401 | 0.271-<br>0.595          |        | 0.002  | 0.476 | 0.301-0.753         |
| Irregular                | 114  |        |        | Ref    | -     | -                        |        | Ref    | -     | -                   |
| Diffuse                  | 19   |        |        | 0.543  | 1.489 | 0.413-<br>5.364          |        | 0.562  | 1.472 | 0.399-5.439         |
| Optic involvement disk   |      | 2.715  | 0.099  |        |       |                          | 1.624  | 0.203  |       |                     |
| Yes                      | 74   |        |        |        |       |                          |        |        |       |                     |
| No                       | 1479 |        |        |        |       |                          |        |        |       |                     |
| Subretinal fluid         |      | 38.747 | <0.001 |        |       |                          | 21.352 | <0.001 |       |                     |
| Yes                      | 1154 |        |        | <0.001 | 2.491 | 1.541-<br>4.027          |        | 0.039  | 1.603 | 1.024-2.507         |
| No                       | 387  |        |        | Ref    | -     | -                        |        | Ref    | -     | -                   |
| Intraocular hemorrhage   |      | 2.118  | 0.146  |        |       |                          | 0.972  | 0.324  |       |                     |
| Yes                      | 77   |        |        |        |       |                          |        |        |       |                     |
| No                       | 1447 |        |        |        |       |                          |        |        |       |                     |
| Ciliary involvement body |      | 21.970 | <0.001 |        |       |                          | 20.126 | <0.001 |       |                     |
| Yes                      | 235  |        |        | 0.954  | 1.063 | 0.132-<br>8.558          |        | 0.971  | 1.040 | 0.125-8.618         |
| No                       | 1317 |        |        | Ref    | -     | -                        |        | Ref    | -     | -                   |
| Extraocular extension    |      | 1.149  | 0.284  |        |       |                          | 1.954  | 0.162  |       |                     |
| Yes                      | 11   |        |        |        |       |                          |        |        |       |                     |
| No                       | 1542 |        |        |        |       |                          |        |        |       |                     |
| TNM stage                |      | 76.879 | <0.001 | 0.625  |       |                          | 68.794 | <0.001 | 0.745 |                     |
| I                        | 198  |        |        | Ref    | -     | -                        |        | Ref    | -     | -                   |
| IIA                      | 609  |        |        | 0.234  | 5.118 | 0.347-<br>75.517         |        | 0.303  | 4.054 | 0.283-58.090        |
| IIB                      | 480  |        |        | 0.592  | 3.507 | 0.036-<br>343.705        |        | 0.580  | 3.655 | 0.037-359.090       |
| IIIA                     | 168  |        |        | 0.614  | 5.216 | 0.008-<br>3210.984       |        | 0.623  | 5.026 | 0.008-<br>3162.337  |
| IIIB                     | 73   |        |        | 0.664  | 6.360 | 0.002-<br>26769.696      |        | 0.716  | 4.764 | 0.001-<br>21496.515 |

|                                 |      |        |              |       |        |              |        |              |       |        |             |
|---------------------------------|------|--------|--------------|-------|--------|--------------|--------|--------------|-------|--------|-------------|
| IIC                             | 2    |        |              | 0.990 | <0.001 | <0.001-      |        |              | 0.987 | <0.001 | <0.001-     |
| <b>Initial treatment</b>        |      | 19.681 | <b>0.001</b> | 0.364 |        |              | 16.895 | <b>0.002</b> | 0.731 |        |             |
| Episcleral brachytherapy        | 1122 |        |              | Ref   | -      | -            |        |              | Ref   | -      | -           |
| Local resection                 | 74   |        |              | 0.939 | <0.001 | <0.001-      |        |              | 0.184 | 0.246  | 0.031-1.950 |
| Enucleation                     | 234  |        |              | 0.181 | 0.675  | 0.380-1.200  |        |              | 0.701 | 0.886  | 0.478-1.643 |
| Local laser phototherapy        | 112  |        |              | 0.668 | 1.224  | 0.486-3.086  |        |              | 0.630 | 0.770  | 0.267-2.224 |
| Observation or refuse treatment | 11   |        |              | 0.118 | 4.931  | 0.665-36.537 |        |              | 0.959 | <0.001 | <0.001-     |
| <b>Pathology</b>                |      | 14.204 | <b>0.001</b> |       |        |              | 14.712 | <b>0.001</b> |       |        |             |
| Spindle cell-type               | 172  |        |              |       |        |              |        |              |       |        |             |
| Epithelioid cell-type           | 83   |        |              |       |        |              |        |              |       |        |             |
| Mixed cell-type                 | 131  |        |              |       |        |              |        |              |       |        |             |

170

171 Abbreviations:

172 *UM: Uveal Melanoma*

173 *LogMAR: Logarithm of the Minimum Angle of Resolution*

174 *TNM: Tumor Node Metastasis*

175

176

177 **Supplementary Table S4. Four-fold cross-validation result for predicting death.**

| <b>Metrics</b> | <b>All features</b>                 | <b>Feature selection</b>             |
|----------------|-------------------------------------|--------------------------------------|
| Accuracy       | 0.7696(0.0358)/<br>[0.6994 0.8398]  | 0.8929 (0.0053) /<br>[0.8825 0.9033] |
| Sensitivity    | 0.7665 (0.0370)/<br>[0.6940 0.8390] | 0.8913 (0.0055)/<br>[0.8805 0.9022]  |
| Specificity    | 0.8393 (0.1072)/<br>[0.6293 1.0000] | 0.9286 (0) /<br>[0.9286 0.9286]      |
| AUC            | 0.8839 (0.0442)/<br>[0.7974 0.9704] | 0.9264 (0.0078)/<br>[0.9112 0.9417]  |

178 *The values in the table are “Mean (Standard Deviation) / [95% Confidence Interval]”, respectively.*179 *Abbreviations:*180 *AUC: Area Under Curve*

181 **Supplementary Table S5. Four-fold cross-validation result for predicting metastasis.**

182

| <b>Metrics</b> | <b>All features</b>                 | <b>Feature selection</b>            |
|----------------|-------------------------------------|-------------------------------------|
| Accuracy       | 0.7495 (0.0244)/<br>[0.7017 0.7974] | 0.6946 (0.0134)/<br>[0.6683 0.7208] |
| Sensitivity    | 0.7467 (0.1131)/<br>[0.5249 0.9684] | 0.9092 (0.0682)/<br>[0.7756 1.0000] |
| Specificity    | 0.7498 (0.0290)/<br>[0.6929 0.8066] | 0.6767 (0.0189)/<br>[0.6396 0.7138] |
| AUC            | 0.8466 (0.0397)/<br>[0.7688 0.9244] | 0.8714 (0.0354)/<br>[0.8021 0.9407] |

183 *The values in the table are “Mean (Standard Deviation) / [95% Confidence Interval]”, respectively.*

184 *Abbreviations: AUC: Area Under Curve*

185 **Supplementary Figures**

186 **Supplementary Figure S1. Six factors related to death according to multivariate analysis.**

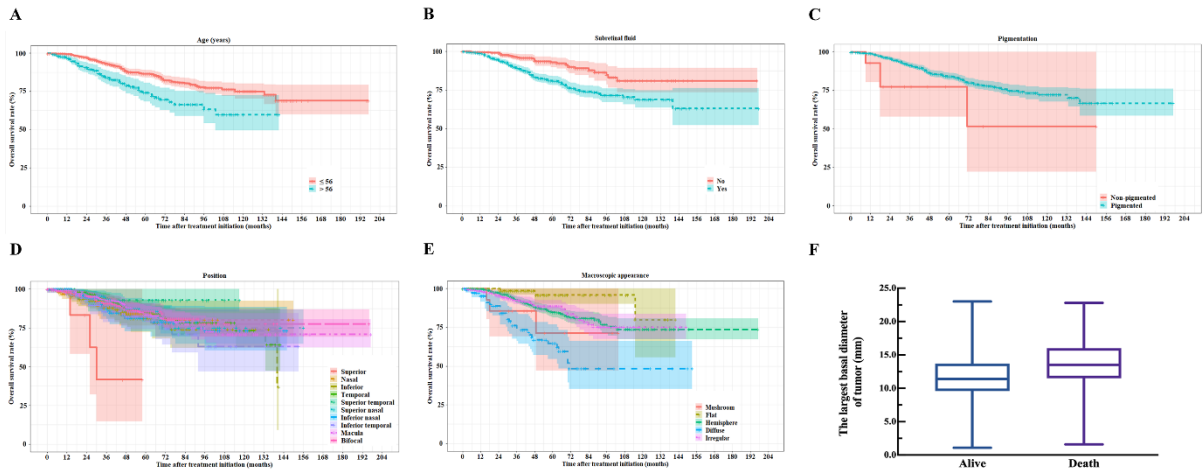

187  
 188 **(A)** Kaplan-Meier graph of age. **(B)** Kaplan-Meier graph of subretinal fluid. **(C)** Kaplan-Meier graph  
 189 of tumor pigmentation. **(D)** Kaplan-Meier graph of tumor position. **(E)** Kaplan-Meier graph of  
 190 tumor’s macroscopic appearance. **(F)** Boxplot of the largest tumor basal diameter by patients’ survival  
 191 state. The line in the box indicated the median, the box indicated the interquartile range, and the top  
 192 and bottom lines represented the maximum and minimum values.

193  
 194 **Supplementary Figure S2. Four factors related to metastasis according to multivariate analysis**

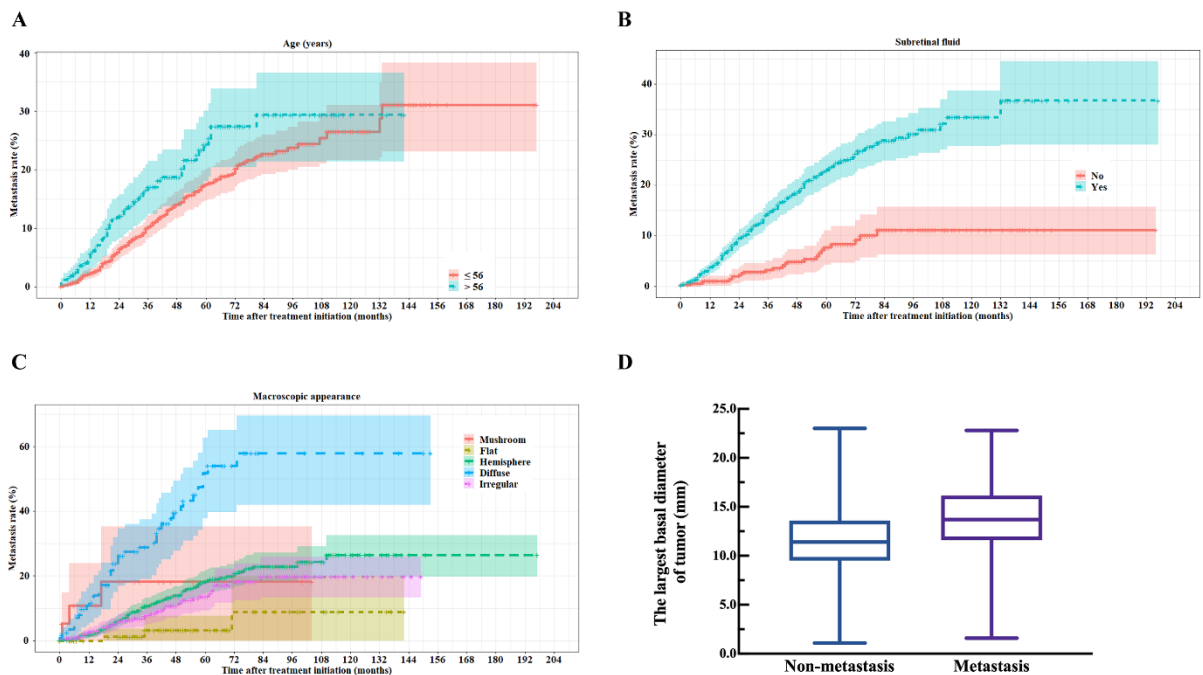

195  
 196 **(A)** Kaplan-Meier graph of age. **(B)** Kaplan-Meier graph of subretinal fluid. **(C)** Kaplan-Meier graph

197 of tumor's macroscopic appearance. (D) Boxplot of the largest tumor basal diameter by patients'  
 198 metastasis state. The line in the box indicated the median, the box indicated the interquartile range,  
 199 and the top and bottom lines represented the maximum and minimum values.

200

### 201 **Supplementary Figure S3. Machine learning result of death model (UMDeath)**

202

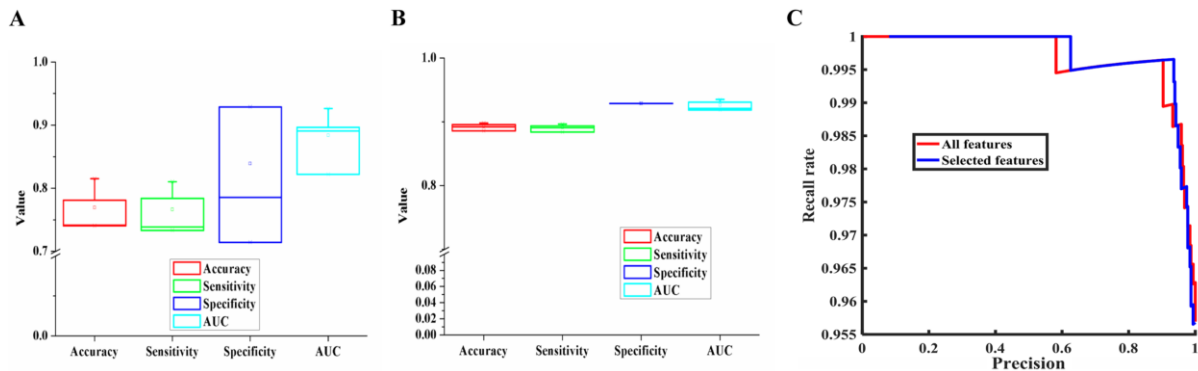

203

204 **(A)** Boxplot of four-fold cross-validation results of all metrics for the predictive results with all features.

205 The line in the box indicated the median, the box indicated the interquartile range, and the top and bottom

206 lines and asterisks represented the 1% and 99% percentiles. The little box indicated the mean value. **(B)**

207 Boxplot of four-fold cross-validation results of all metrics for the predictive results with selected features.

208 **(C)** PR curve of predicting model for death after two years of treatment.

209 *Abbreviations: PR: Precision-Recall, AUC: Area Under Curve*

210

### 211 **Supplementary Figure S4. Machine learning result of metastasis model (UMMetastasis)**

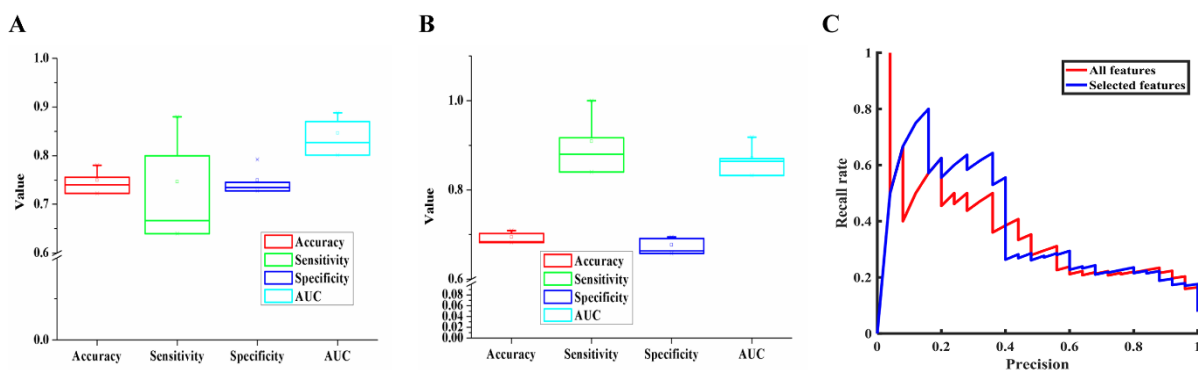

212

213 **(A)** Boxplot of four-fold cross-validation results of all metrics for the predictive results with all features.

214 The line in the box indicated the median, the box indicated the interquartile range, and the top and bottom

215 lines and asterisks represented the 1% and 99% percentiles. The little box indicated the mean value. **(B)**

216 Boxplot of four-fold cross-validation results of all metrics for the predictive results with selected features.



217 (C) PR curve of predicting model for metastasis within two years of treatment.

218 *Abbreviations: PR: Precision-Recall, AUC: Area Under Curve*

219

220

221
